# Supplementary material for: Assimilation of snow water equivalent from AMSR2 and IMS satellite data utilizing the local ensemble transform Kalman filter
Source: Copernicus journal article supplement (doi:10.5194/gmd-17-8799-2024), 2024-12-11
Supplement: Supplementary file 1 [file gmd-17-8799-2024-supplement.pdf]

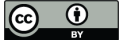

*Supplement of*

**Assimilation of snow water equivalent from AMSR2 and IMS  
satellite data utilizing the local ensemble transform Kalman filter**

**Joonlee Lee et al.**

*Correspondence to:* Myong-In Lee (milee@unist.ac.kr)

The copyright of individual parts of the supplement might differ from the article licence.

1 **Supplementary Information**

2 **Table S1** Confusion matrices for the experiment products (e.g., AMSR2, Openloop, JRA55,  
3 and the DA) against IMS data. Overall accuracy =  $(A+D) / (A+B+C+D)$

---

|                    | IMS SNOW | IMS NO SNOW |
|--------------------|----------|-------------|
| EXPERIMENT SNOW    | A        | B           |
| EXPERIMENT NO SNOW | C        | D           |

---

4

5

1

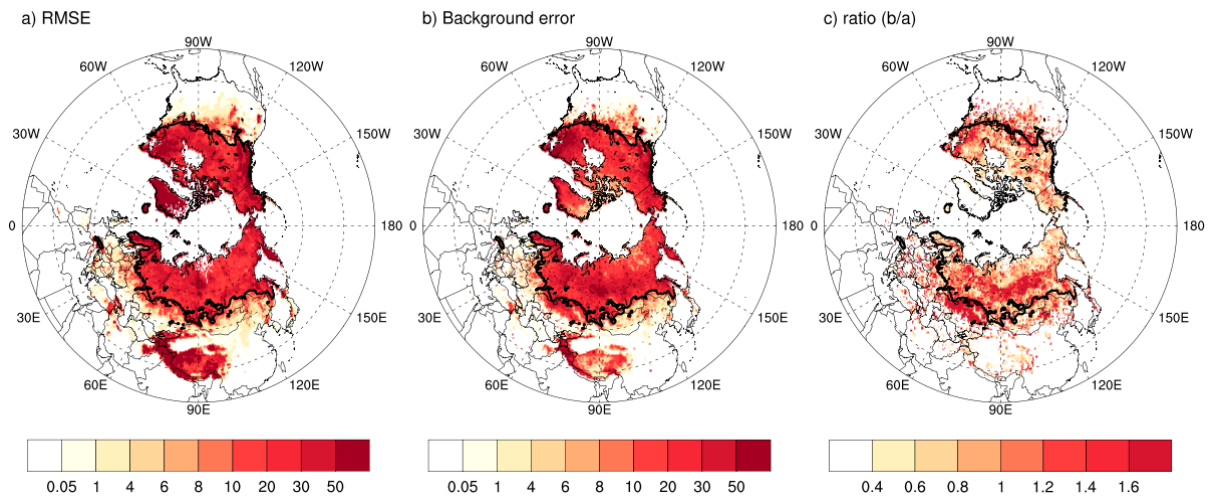

2

3 **Fig. S1** Spatial distribution of root mean square error (RMSE, unit:  $\text{kg/m}^2$  or mm) with CMC,  
4 model ensemble spread, and ratio. The black line represents the boundary of the  
5 transition region, defined as the climatological-mean SWE of less than 16mm.

6

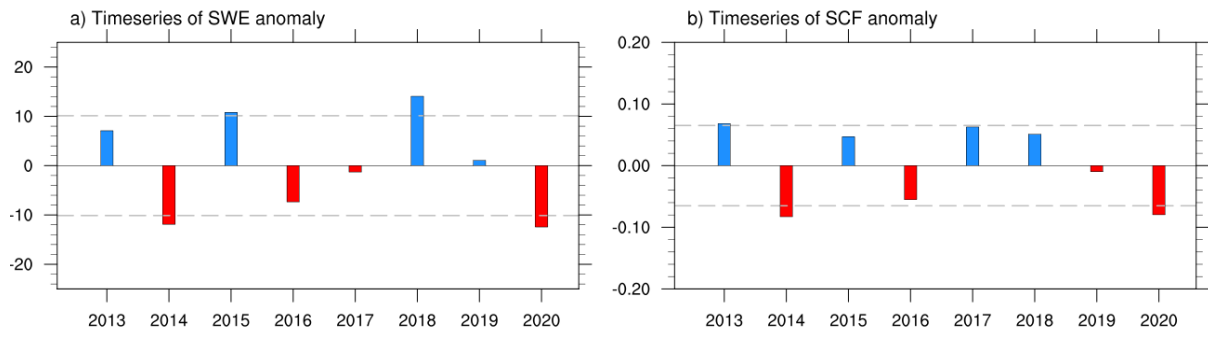

1  
2  
3  
4  
5  
6  
7

**Fig. S2** Time series of the area-averaged SWE (unit: kg/m<sup>2</sup> or mm) and SCF anomaly of CMC and IMS, respectively, in Eurasian bounded by 48–65 °N and 55–120 °E, as shown by the red box in Figure 10. The dotted lines represent the one standard deviations of each variable.

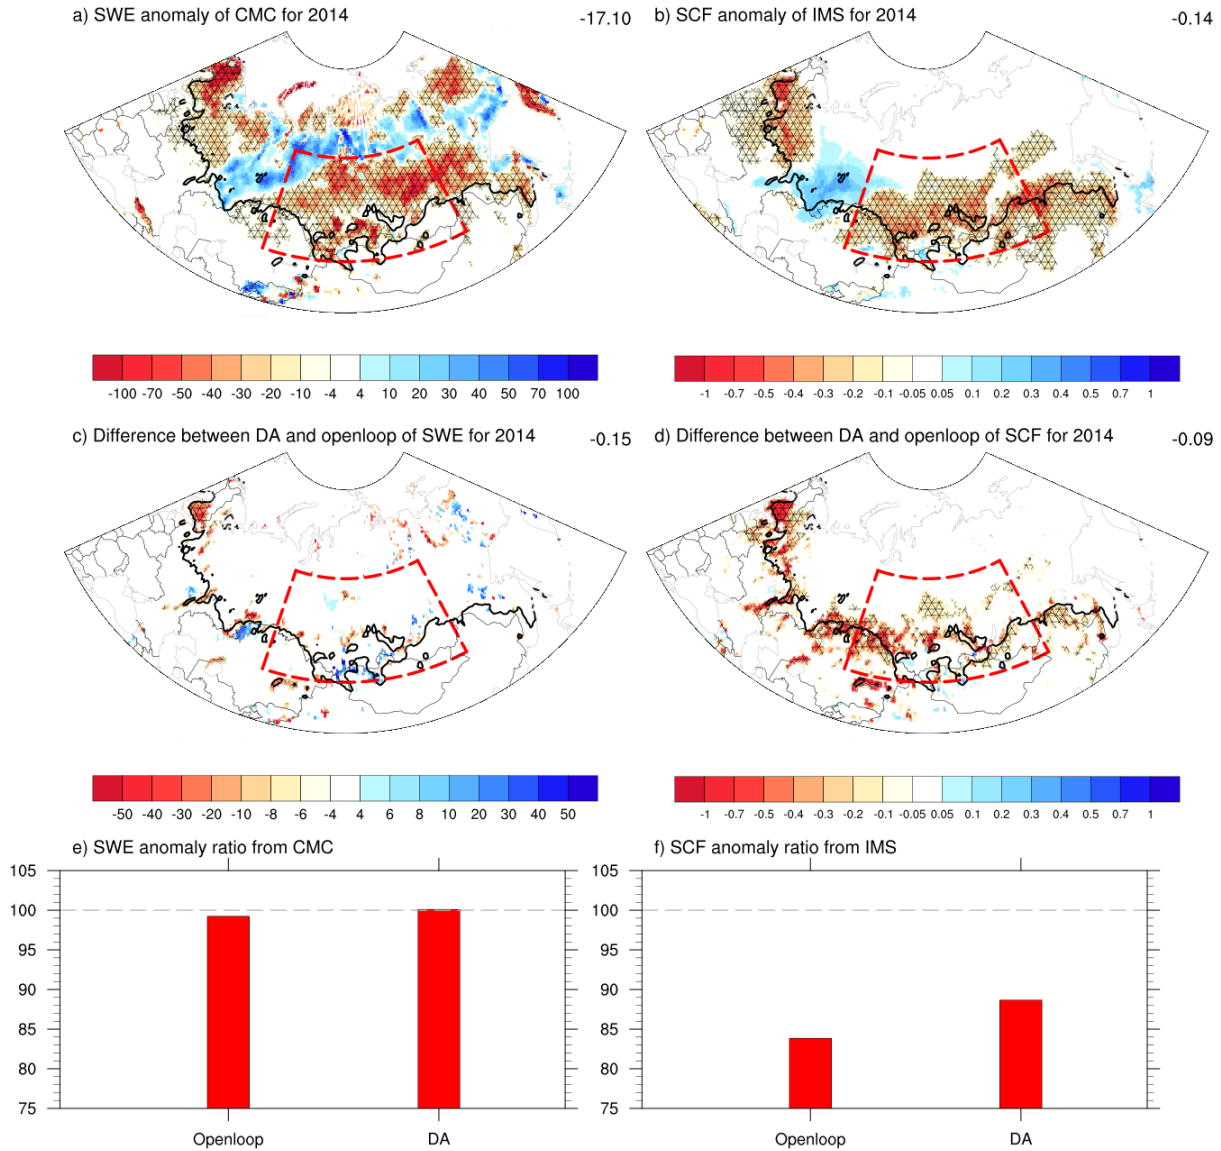

1

2 **Fig. S3** Anomalies of a) SWE (unit: kg/m<sup>2</sup> or mm) from CMC and b) SCF from IMS as well  
 3 as the difference (c, d) of variables between DA and Openloop in April 2014. Bar chart  
 4 (e, f) indicates the ratio of DA and Openloop to verification data such as CMC and IMS  
 5 in the red box (48–65°N and 70–120 °E), which is the region associated with extreme  
 6 high-temperature events, focused on this study. Negative values (areas) in red shades  
 7 are indicated with hatching.

8

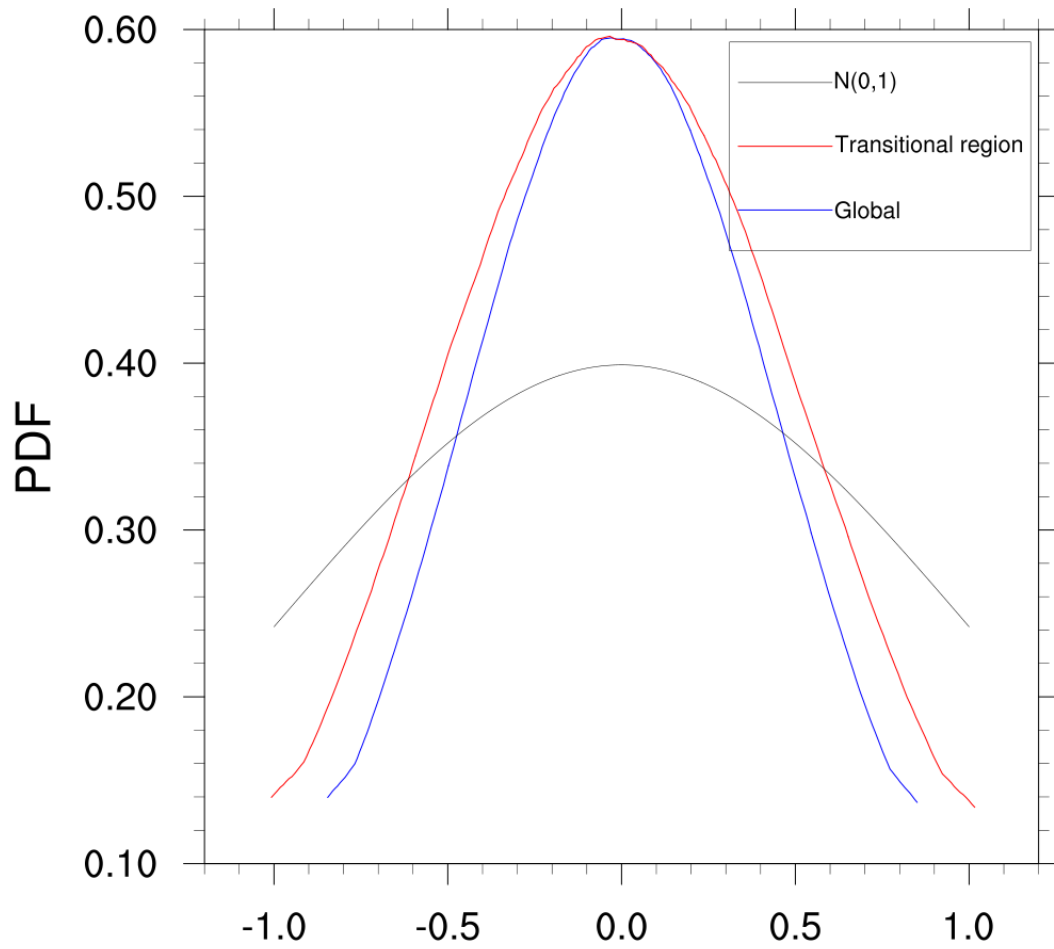

1

2 **Fig. S4** Probability density function (PDF) of the standardized SWE ensemble perturbation,  
3 with the ensemble mean removed from each ensemble member, at each grid point. The  
4 PDF is averaged globally (blue line) and for the transition region (red line) for April  
5 from 2013 to 2020. The black line represents the standardized Gaussian function  $N(0,1)$ .
